# Supplementary material for: FDA Approval Summary: Glasdegib for Newly Diagnosed Acute Myeloid Leukemia
Source: Oxford University Press journal article supplement (doi:10.1158/1078-0432.ccr-19-0365), 2019-05-07
Supplement: 10780432ccr190365-sup-216385_2_supp_5484912_pql969.docx [file 10780432ccr190365-sup-216385_2_supp_5484912_pql969.docx]

**Supplementary Figure 1: Overall Survival Subpopulation Analysis for Patients with Newly-Diagnosed AML***


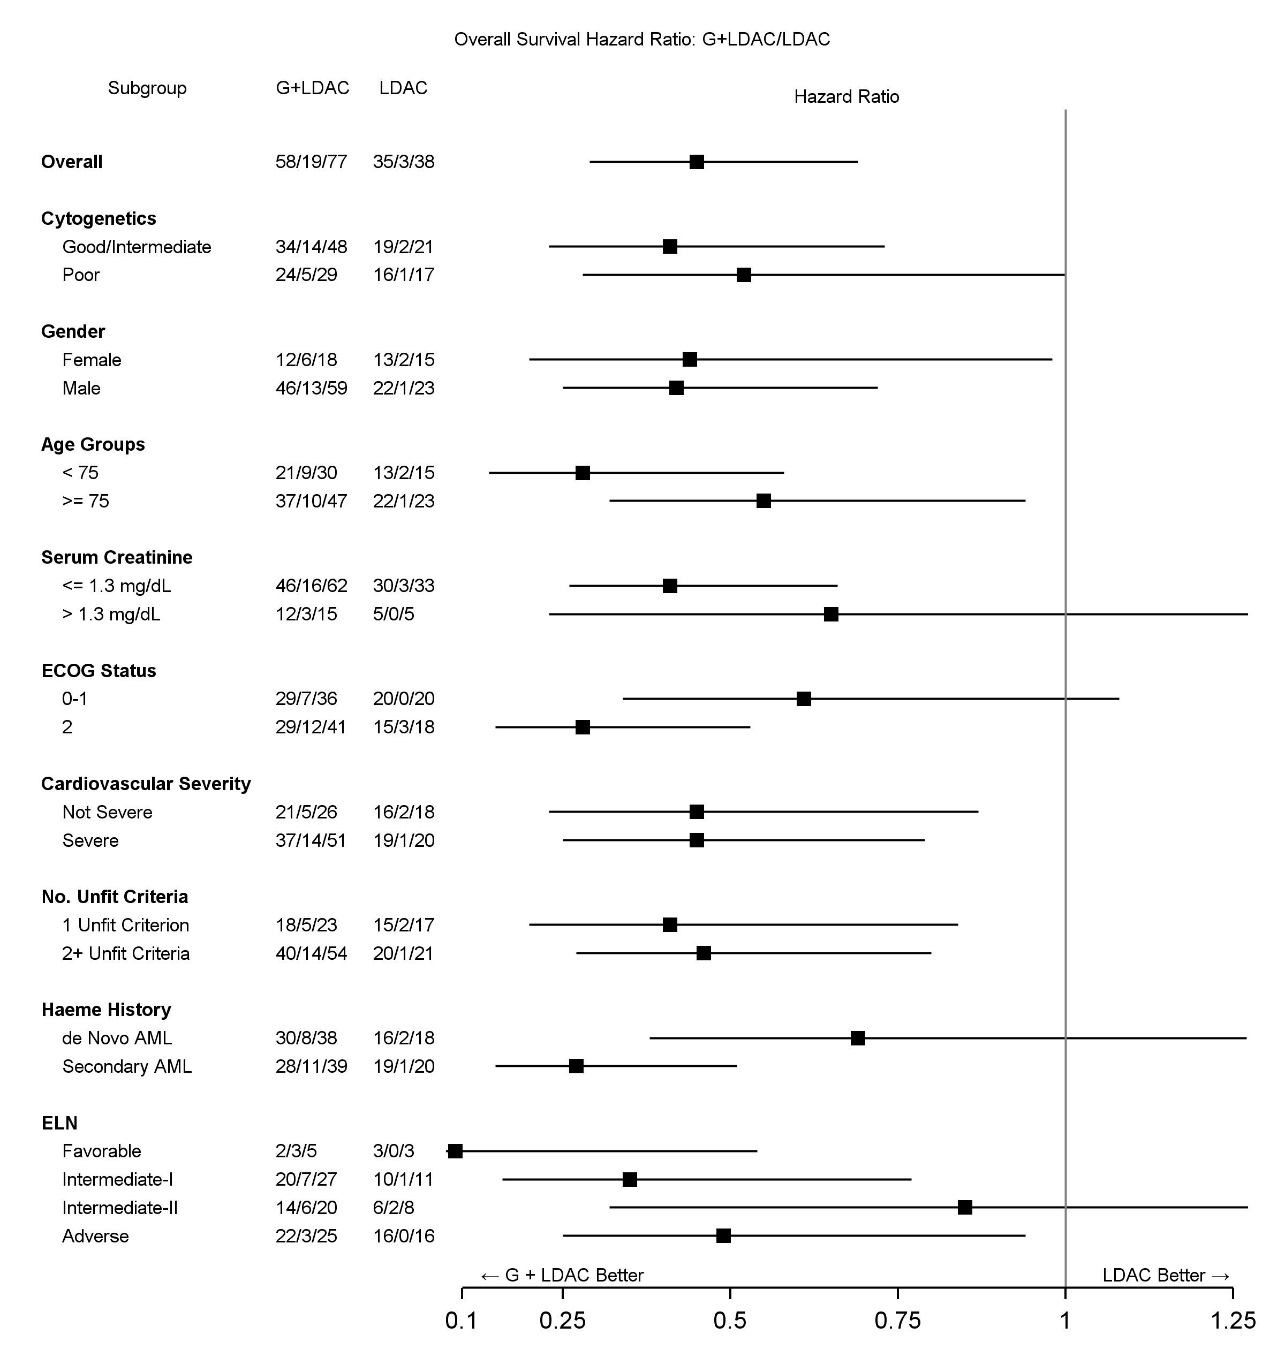


*Hazard ratios for survival by demographic and disease-based subgroups in Study BRIGHT AML 1003. Note that values in the

treatment columns have the format A/B/C, where A = number of events, B = number censored, and C = total number of

patients.

Abbreviations: ECOG, Eastern Cooperative Oncology Group; ELN, European LeukemiaNet risk classification; G, glasdegib; LDAC, low-dose cytarabine
